# Supplementary material for: FOXL2 and DMRT1L Are Yin and Yang Genes for Determining Timing of Sex Differentiation in the Bivalve Mollusk Patinopecten yessoensis
Source: Front Physiol. 2018 Aug 22;9:1166. doi: 10.3389/fphys.2018.01166 (PMC6113668; doi:10.3389/fphys.2018.01166)
Supplement: Supplementary file 1 [file Data_Sheet_1.ZIP]

Archive with 4 entries (3 files):
- Supplementary material/
- Supplementary material/Multiple alignment of DMRT.phy
- Supplementary material/Multiple alignment of FOXL2.phy
- Supplementary material/Supplementary material.pdf
