# Supplementary material for: FOXL2 and DMRT1L Are Yin and Yang Genes for Determining Timing of Sex Differentiation in the Bivalve Mollusk Patinopecten yessoensis
Source: Front Physiol. 2018 Aug 22;9:1166. doi: 10.3389/fphys.2018.01166 (PMC6113668; doi:10.3389/fphys.2018.01166)
Supplement: Supplementary file 1 [file Data_Sheet_1.ZIP › Supplementary material/Multiple alignment of FOXL2.phy]

18 489
Homo_sapiens_FOXL2   ---------------MMASYPEPEDAAGALLAPETGRTVK-----------------------------------------EPEGPPPSPGKGGGGGG------------------------------------GTAPEKPD-----PAQKPPYSYVALIAMAIRESAEKRLTLSGIYQYIIAKFPFYEKNKKGWQNSIRHNLSLNECFIKVPREGGGERKGNYWTLDPACEDMFEKGNYRRRRRMKRPFRPPPAHFQPGKGLFGAGGAAGGCGVAGAGADGYGYLAPPKYLQSGFLNN-SWPLPQPPSPMPYASCQMAAAAAAAAAAAAAAAAAAAAAAAAAGPGSPGAAAVVKGLAGPAASYGPYTRVQSMALPPGVVNSYNGLGGPPAAPPPPP---HPHPHPHAHHLHAAAAPPPAPPHHGAAAPPPGQLSPASPATAAPPAPAPTSAPGLQFACARQP-ELAMMHCSYWDHDSKTGALHSRLDL
Mus_musculus_FOXL2   ---------------MMASYPEPEDTAGTLLAPESGRAVK-----------------------------------------EAEASPPSPGKGG----------------------------------------GTTPEKPD-----PAQKPPYSYVALIAMAIRESAEKRLTLSGIYQYIIAKFPFYEKNKKGWQNSIRHNLSLNECFIKVPREGGGERKGNYWTLDPACEDMFEKGNYRRRRRMKRPFRPPPAHFQPGKGLFGSGGAAGGCGVPGAGADGYGYLAPPKYLQSGFLNN-SWPLPQPPSPMPYASCQMAAAAAAAAAA-----------AAAAGPGSPGAAAVVKGLAGPAASYGPYSRVQSMALPPGVVNSYNGLGGPPAAPPPPPPPPHPHPHPHAHHLHAAAAPPPAPPHHGAAAPPPGQLSPASPATAAPPAPAPTSAPGLQFACARQP-ELAMMHCSYWDHDSKTGALHSRLDL
Gallus_gallus_FOXL2  ---------------MMSGYADGEEDAVAMLAHDGGGSKE-----------------------------------------PERGKEELSAEKG-------------------------------------------PEKPD-----PSQKPPYSYVALIAMAIRESAEKRLTLSGIYQYIISKFPFYEKNKKGWQNSIRHNLSLNECFIKVPREGGGERKGNYWTLDPACEDMFEKGNYRRRRRMKRPFRPPPTHFQPGKSLFGP--------------DGYGYLSPPKYLQSTFMNN-SWPLPQPPAPVPYASCQMSG-----------------------GSVSP---VNVKGLSGP-ASYGPYSRVQSVALP-GMVNSYNGVA-------------------HPHHPH---------------AHHPQQLGPASPA---PPAAPAANGAGLQFACARQPAELSVMHCSYWEHDSKHGALHSRIDI
Xenopus_laevis_FOXL2 ----------------MASFQSPEPGPVALMSHNSNGNKE-----------------------------------------SDRGKEELQQEKG-------------------------------------------QEKSD-----PSQKPPYSYVALIAMAIRESQEKRLTLSAIYQYIISKFPFYEKNKKGWQNSIRHNLSLNECFIKVPREGGGERKGNYWTLDPACEDMFEKGNYRRRRRMKRPFRPPPTHFQAGKSLFGS--------------DTYGYLSPPKYLQSTFMNN-SWPLSQPPAPVSYTSCQMAG-----------------------GNVSP---VNVKGLSAS-SSYSPYSRVQSMSLP-SMVNSYNGMS-------------------HHHHPHAHHS---------HHSHHAQQLSPASPP---PAPPAPPN--GVQFTCARQPPELSMMHCSYWDHDAKHSALHARIDL
Danio_rerio_FOXL2    ---------------MMATYPGHEDNGMILMDT-TSSSAE-----------------------------------------KDRTKDEAPPEKG-------------------------------------------PDKSD-----PTQKPPYSYVALIAMAIRESSEKRLTLSGIYQYIISKFPFYEKNKKGWQNSIRHNLSLNECFIKVPREGGGERKGNYWTLDPACEDMFEKGNYRRRRRMKRPFRPPPTHFQPGKSLFGG--------------EGYGYLSPPKYLQSGFINN-SWS----PAPMSYTSCQVSS-----------------------GSVSP---VNMKGLSAP-SSYNPYSRVQSIGLP-SMVNSYNGIS-------------------HHHHHHHTHP---------HALPHAQQLSPATAA---APPVTTGNGTGLQFACSRQPAELSMMHCSYWDHESKHSALHARIDI
Dicentrarchus_labrax_FOXL2 ---------------MMATYQNPEDDAMALMIHDTNTTKE-----------------------------------------KERPKEEPVQDKV-------------------------------------------PEKPD-----PSQKPPYSYVALIAMAIRESSEKRLTLSGIYQYIISKFPFYEKNKKGWQNSIRHNLSLNECFIKVPREGGGERKGNYWTLDPACEDMFEKGNYRRRRRMKRPFRPPPTHFQPGKSLFGG--------------DGYGYLSPPKYLQSSFMNN-SWSLGQPPTPMSYTSCQMAS-----------------------GNVSP---VNVKGLSAP-SSYNPYSRVQSMALP-SMVNSYNGMS-------------------HHHHPAH--------------PHHAQQLSPATAA---PPPVSSSNGAGLQFACSRQPAELSMMHCSYWEHETKHSALHTRIDI
Oreochromis_niloticus_FOXL2 ---------------MMATYQNPEDDAMALMIHDTNTTKE-----------------------------------------KERPKEEPVQDKV-------------------------------------------SEKPD-----PSQKPPYSYVALIAMAIRESSEKRLTLSGIYQYIITKFPFYEKNKKGWQNSIRHNLSLNECFIKVPREGGGERKGNYWTLDPACEDMFEKGNYRRRRRMKRPFRPPPTHFQPGKALFGG--------------DSYGYLSPPKYLQSSFMNN-SWSLGQPPTPMSYTSCQMAS-----------------------GNVSP---VNVKGLSAP-SSYNPYSRVQSMALP-SMVNSYNGMS-------------------HHHH-----------------PHHTQQLSPATAA---PPPVSSSNGAGLQFACSRQPAELSMMHCSYWEHETKHSALHTRIDI
Danio_rerio_FOXL3    ---------------------------MDLCAGSVDLQCR-----------------------------------------DAAVEDCSETAGC-------------------------------------------PGAAP-----APEKPPYSYVALIAMAIRESEDKKLTLNDIYSYIISKFPYYEKNKKGWQNSIRHNLSLNECFVKIPRESGGERKGNFWTLDPAFNDMFEKGNYRRRRRVKRPYRPAALP--SGYN---FA-------------DPYCLQQEPVYWQSPFVSSGSWSHHSGSPTHISS--------------------------------------YMLGNARPLSPNDFAN---------SPVSYYHGHHP------------------HFHPSYR------------PYHRHPNALVPLS------GMTPPVSPGGSSISTCSYAPQNS----------HPEL-VHHQFD-
Dicentrarchus_labrax_FOXL3 -------------MDAE-----------EKSPADSGVQLL-----------------------------------------DIGSNSPPPEPKS-------------------------------------------TEDT-----GHLEKPPFSYVALIAMAIKESAVKRQTLSGIYDYIISKFPYYEKNKKGWQNSIRHNLSLNECFVKVPRESGGDRKGNFWMLDPAFEDMFEKGNYRRRRRVRRPYRPASVPYLTGNP-VEYP-------------DPLYLQ--------PYVS--PWGLCQPSSSQTTG--YPAP-------------------------------QVITGHTRSVSPSGPVS---------SYCPSPHFH----------------------HPAYG------------AYHRHPPVLVPHNGC-PYGGVTQPMSPDGGTASVGCSYQQFTSYAR------QAEAPLGHSYDL
Oncorhynchus_mykiss_FOXL3 -------------MDKEDIHGEQQLDILDLTDSSSGMAKS-----------------------------------------KGSADSADSAAEG-------------------------------------------VDETDKARVGQTEKPPYSYVALIAMAIKESREKRLTLSGIYQFIISKFPYYEKNKKGWQNSIRHNLSLNECFLKVPREGGGDRKGNFWTLDPAFENMFEKGNYRRRRRVRRPYRPATVPYIAGTTCVDYP-------------EHFYLQQKPVYVQAPFVSN-PWTLSQPNSPQATSYSYPQS-------------------------------QPINGQVHSVSPNGYAS---------SPVTYYHNHQ--------------------FHATYS------------AYHRHASVVMPHNGC-PCGGMTQPLSPGGGSTSQAC-YPQFS-FAI------QPEMPLAHSFE-
Lottia_gigantea_FOXL2 MN---------------LSTMDYKLNLNHQDFYSTGPGVK---MEPLDSSKYLDIKASKHDKIPEDIP-------------EKKSEDSEKSKDSVKDN--------------------------------------VNEHTD-----PNTKPPYSYVALIAMAIKESTEKRLTLSGIYNFIVGKFPYYEKNKKGWQNSIRHNLSLNECFVKVPREGGGERKGNYWTVDPAFEDMFEKGNYRRRRRMKRPYRPAISLPKPLFA-DSSC----------------AFNQFA-FTKNYLSSP--YSQYSQYSPWS-LTSHNNS-------------------------------QNNMSSMSNINNYGSC--QRVP-----STINPYSG-------------------------------------------MQPSGVQMSPN---PTP-YPQFNDYGTVTGS---GPFAF-PCRQQTEAFSPMHYPYWTD-
Crassostrea_gigas_FOXL2 MSENKN--------ENVSNSVS-DENFYDFKMRLMRPSSK--FLESGFSESSFENKIWKHSFLSGEFSSNCKYGSKVSFGIAARLENPSNSKPAENKE--EEFVETKKIKSE---KLEEKSKSS----AGNVKIENENKYTD-----PEQKPPFSYVALIAMAIKESSEKRLTLSGIYQFIINKFPYYEKNKKGWQNSIRHNLSLNECFVKVPREGGEERKGNFWTLDPAFEDMFEKGNYRRRRRMRRPYRASLSLPKPLFAPDSHCG---------------PYNQFS-LSKPYFSPPP-YSQYSQYQGWAQALAHNSSQ------------------------------AGMASAMNQIGNYSSCTQGRVPPPGASITQCGYN--------------------------------------------AMQQAMQISPP---HAPSYTQLNDYPAVPTP--GTGFPF-AYRQQGDTLNHMHYSYWTDR
Crassostrea_virginica_FOXL2 MSDNKN--------ENLSNSAS-DENFYDFKMRLMRPSSK--FLESGFSENGFENKIWKHSFLPSDFPPNCKYGSKVSFGIAARLENPSNSKDNKGVENKEEFVEPKKIKSE---KLEEKS-------TGKVKVEDENKYTD-----PDQKPPFSYVALIAMAIKESSEKRLTLSGIYQFIINKFPYYEKNKKGWQNSIRHNLSLNECFVKVPREGGGERKGNFWTLDPAFEDMFEKGNYRRRRRMRRPYRAALSIPKPLFAPESHCG---------------PYNQFS-LSKPYFSPPP-YSQYSQYQGWAQALAHNSSQ------------------------------AGMA--MNQINNYSSCTQGRVPPPGASLTQCSYN--------------------------------------------AMQQAMQISPP---HAPSYTQLNDYPAVPTP--GTGFPF-AYRQQGDTLNHMHYTYWSDR
Pinctada_margaritifera_FOXL2 MSEIDLRFKDVKFAENMNFRIENEETLTELRHRHFRSVMK--GIESGLNEP-LDSKIWKPSIISSDFSSTCKYGSK--FGIAARLENNSSTKPKDDSN--AQNVKVKNVKSENEIKTEHQSKGSSKTCQENIKDEEDLRHCD-----PDQKPPYSYVALIAMAIKESGEKRLTLSGIYQYIINKFPYYEKNKKGWQNSIRHNLSLNECFVKVPREGGGERKGNFWTLDPAFEDMFEKGNYRRRRRMRRPYRAALSLPKPLFA-DGNYG---------------SYNQFS-LTKSYFTPPPAYSQYSQYSPWAQAFAQTSP-------------------------------HNVASAMNQIGGYASCTQARVP-----ASQCGYNA-------------------------------------------AVQSAMQMSPS---PGPTYPQLNDYGSLPPPPHGASFPF-PYRQQAEPLNHMHYTYWTDR
Pinctada_maxima_FOXL2 MSEIDLRFKDVKFAENMNFRIENEETLTELRHRHFRSVIK--GIESGLNEP-LDSKIWKPSIISSDFSSTCKYGSK--FGIAARLENNSSAKSKDDSS--AQNVKVKNVKSENEIKTEHQSKGSSKTCQENIKEEEDLRHCD-----PDQKPPYSYVALIAMAIKESGEKRLTLSGIYQYIINKFPYYEKNKKGWQNSIRHNLSLNECFVKVPREGGGERKGNFWTLDPAFEDMFEKGNYRRRRRMRRPYRAALSLPKPLFA-DGNYG---------------SYNQFS-LTKSYFTPPPAYSQYSQYSPWAQAFAQTSP-------------------------------HNVASAMNQIGGYASCTQARVP-----ASQCGYNA-------------------------------------------AVQSAMQMSPS---PGPTYPQLNDYGSLPPPPHGASFPF-PYRQQTEPLNHMHYTYWTDR
Chlamys_farreri_FOXL2 MALSFY-----------DSKMEEKADFMDIKFRLFRGGKRPEGFGDNIDNTCDATKTWKQHVGSGLSSPHYKYSSKVSYGVAARLQNNQHCEDKLTET-----EDLKPVKNDTEVKEETPIMPIQRDSKCRKFEEDSNKYSD-----PDQKPPFSYVALIAMAIKESGDKRLTLSGIYQYIISKFPYYERNKKGWQNSIRHNLSLNECFVKVPREGGGERKGNFWTLDPAFNDMFEKGNYRRRRRMRRPYRAAISLPKPLFA-DNHCG---------------PYNQFAQLTKPYFSPPP-YSQYSQYSPWA--LTHNAS-------------------------------AHQGMGMSQISNFNSCTQARVPPPGSTISSCGYN--------------------------------------------PLPSGVQLSPS---AGTTYSQLNDYNAVNPS---GPFPFGPYRQQGDSLNAVHYTYWGER
Patinopecten_yessoensis_FOXL2 MALSFY-----------DSKMEENADFMDIKFRLFRGGKRPEGFSDNIDNTSDATKTWKQHVGSGLSSPHYKYSSKVAYGVAARLQNNQHCEDKIPET-----EDPKPMKNDTKVKEETPIMSIQRDSKCRKFEEDSNKYSD-----PDQKPPFSYVALIAMAIKESGDKRLTLSGIYQYIISKFPYYERNKKGWQNSIRHNLSLNECFVKVPREGGGERKGNFWTLDPAFNDMFEKGNYRRRRRMRRPYRAAISLPKPLFA-DNHCG---------------PYNQFAQLTKPYFSPPP-YSQYSQYSPWA--LTHNAS-------------------------------AHQGMGMSQISNFNSCTQARVPPPGSTLSSCGYN--------------------------------------------PLPSGVQLSPS---AGTTYSQLNDYNSVNPS---GPFPFGPYRQQGDSLNTVHYTYWGER
Suberites_domuncula_FOXL2 ------------------------MGMEGYPKPASNASVER---------------------------------------LKKSLFAAVNTES---------------------------------------------DRNE------DVKPPYSYVALIAMSIAKSPDKRLTLSGIYQYIMDNFPYYAKNKKGWQNSIRHNLSLNECFVKVPKE-GGDRKGNYWTLDESCEEMFEKGNFKRRKRMKRPTKPQSEPKKAIYFTTGNPG---------------AIFYEDHVGYHPYAAPAASYPPAHISPLSAATNFSWP--------------------------------SSYGIKNSPPSTPMTGTGICTMDTYRPYSSSYNLG-------------------------------------------TTNTSQYTMP----GQSIGMYGSATYLPSPGLGLGATNGYPAYSYSGMMDAKAM-----
